## Big city, small world: Density, contact rates, and transmission of dengue across Pakistan

Kraemer, M.U.G.\*<sup>1</sup>, Perkins, T. A.<sup>2,3</sup>, Cummings, D.A.T.<sup>4</sup>, Zakar, R.<sup>5</sup>, Hay, S.I.<sup>3,6,7</sup>, Smith, D.L.<sup>1,3,8</sup>, and Reiner, R.C.\*<sup>3,9</sup>

1. Department of Zoology, University of Oxford, Oxford, OX1 3PS, United Kingdom;
2. Department of Biological Sciences and Eck Institute for Global Health, University of Notre Dame, Notre Dame, IN 46556, United States;
3. Fogarty International Center, National Institutes of Health, Bethesda, MD 20892, United States;
4. Department of Epidemiology, Johns Hopkins University, Bloomberg School of Public Health, Baltimore, MD 21205, United States;
5. Department of Public Health, University of Punjab, Lahore, 54590, Pakistan;
6. Wellcome Trust Centre for Human Genetics, University of Oxford, Oxford, OX3 7BN, United Kingdom;
7. Institute for Health Metrics and Evaluation, University of Washington, Seattle, WA 98121, United States;
8. Sanaria Institute for Global Health and Tropical Medicine, Rockville, MD 20850, United States;
9. Department of Epidemiology and Biostatistics, Indiana University School of Public Health, Bloomington, IN 47405, United States;

\* Author for correspondence: [moritz.kraemer@zoo.ox.ac.uk](mailto:moritz.kraemer@zoo.ox.ac.uk) or [rcreiner@indiana.edu](mailto:rcreiner@indiana.edu)

### Abstract:

Macroscopic descriptions of populations commonly assume that encounters between individuals are well mixed; i.e., each individual has an equal chance of coming into contact with any other individual. Relaxing this assumption can be challenging though, due to the difficulty of acquiring detailed knowledge about the non-random nature of encounters. Here, we fitted a mathematical model of dengue virus transmission to spatial time series data from Pakistan and compared maximum-likelihood estimates of “mixing parameters” when disaggregating data across an urban-rural gradient. We show that dynamics across this gradient are subject not only to differing transmission intensities but also to differing strengths of nonlinearity due to differences in mixing. We furthermore show that neglecting spatial variation in mixing can lead to substantial underestimates of the level of effort needed to control a pathogen with vaccines or other control efforts. We complement this analysis with relevant contemporary environmental drivers of dengue.

**Keywords:** dengue, epidemiology, heterogeneity, mixing, nonlinearity, spatial dynamics, vector-borne diseases, victim-exploiter dynamics

45 **Introduction:**

46 The transmission dynamics of all infectious diseases depend on a few basic but key  
47 determinants: the availability of susceptible and infectious hosts, contacts between them, and  
48 the potential for transmission upon contact. Susceptibility is shaped primarily by historical  
49 patterns of transmission, the natural history of the pathogen, the host's immune response, and  
50 host demography (Grenfell *et al.* 2004). What constitutes an epidemiologically significant  
51 contact depends on the pathogen's mode of transmission (Stoddard *et al.* 2009), and structure  
52 in contact patterns can be influenced by transportation networks and the spatial scale of  
53 transmission (Brockmann & Helbing 2013), by host heterogeneities such as age (Kilpatrick *et al.*  
54 *et al.* 2006), and dynamically in response to the pathogen's influence on host behavior (Fenichel  
55 *et al.* 2011). Whether transmission actually occurs during contact between susceptible and  
56 infectious hosts often depends heavily on environmental conditions (Shaman *et al.* 2010;  
57 Gilbert *et al.* 2014; Weiss *et al.* 2014b). Disentangling the relative roles of these factors in  
58 driving patterns of disease incidence and prevalence is a difficult but central pursuit in  
59 infectious disease epidemiology, and mathematical models that are specific about the biology  
60 of how these mechanisms interact represent an indispensable tool in this pursuit (Anderson &  
61 May 1991).

62  
63 The time-series susceptible-infected-recovered (TSIR) model was developed by Finkenstädt &  
64 Grenfell (2000) to offer a more accurate and straightforward way to statistically connect  
65 mechanistic models of infectious disease transmission with time series data. Among other  
66 features, TSIR models readily account for inhomogeneous mixing in a phenomenological way  
67 by allowing for nonlinear dependence of rates of contact between susceptible and infectious  
68 hosts on their densities. Although this is a simple feature that can be incorporated into any  
69 model based on mass-action assumptions – indeed, earlier applications pertained to  
70 inhomogeneous mixing in predator-prey systems (Pascual & Levin 1999) – the “mixing  
71 parameters” that determine the extent of this nonlinearity have primarily been fit to empirical  
72 data in applications of the TSIR model to transmission of measles, cholera, rubella, and  
73 dengue (Bjørnstad *et al.* 2002; Koelle & Pascual 2004; Metcalf *et al.* 2011; Reich *et al.* 2013).  
74 Applied to discrete-time models such as the TSIR, mixing parameters also have an  
75 interpretation as corrections for approximating a truly continuous-time process with a discrete-  
76 time model (Liu *et al.* 1987; Glass *et al.* 2003). In no application of the TSIR model to date has  
77 the potential for variation in these parameters been assessed, leaving the extent to which

78 inhomogeneity of mixing is different in space and time as an open question in the study of  
79 infectious disease dynamics.

80

81 There are a number of reasons why mixing might vary in time or space. Seasonal variation in  
82 mixing might arise because of travel associated with labor (Bharti *et al.* 2011), religious events  
83 (Lessler *et al.* 2014), or vacation (Deville *et al.* 2014). A major driver of flu is associated with  
84 the timing of school openings (Salathé *et al.* 2010), social networks (Cauchemez *et al.* 2011),  
85 and spatial variation in mixing could arise because of cultural differences and the geographic  
86 scales of interest (Brockmann & Helbing 2013; Vazquez-Prokopec *et al.* 2013; Read *et al.*  
87 2014), because of variation in the density and quality of roads (Uchida & Nelson 2008), or  
88 because of variation in human densities and myriad factors associated with that (Bjørnstad *et al.*  
89 *et al.* 2002; Simini *et al.* 2012). For vector-borne diseases, variation in mixing is amplified even  
90 further by variation in vector densities (Perkins *et al.* 2013), which effectively mediate contact  
91 between susceptible and infectious hosts.

92

93 Dengue is a mosquito-borne viral disease with a strong potential for spatial variation in mixing  
94 (Brady *et al.* 2012; Bhatt *et al.* 2013). The dominant vectors of dengue viruses (*Aedes spp.*)  
95 thrive in areas where they are able to associate with humans, as humans provide not only a  
96 preferred source of blood but also water containers that the mosquitoes use for egg laying and  
97 for larval and pupal development (Morrison *et al.* 2008). Two additional aspects of *Aedes*  
98 ecology – limited dispersal distance of the mosquito (Harrington *et al.* 2005) and daytime biting  
99 (Akram *et al.* 2009) – imply that human movement should be the primary means by which the  
100 viruses spread spatially (Stoddard *et al.* 2009). Indeed, analyses of dengue transmission  
101 dynamics at a variety of scales have strongly supported this hypothesis (Allicock *et al.* 2012;  
102 Stoddard *et al.* 2013; Bhooniboonchoo *et al.* 2014; Reiner *et al.* 2014). To the extent that  
103 human movement in dense urban environments is more well-mixed than elsewhere, there are  
104 likely to be differences in the extent of inhomogeneous mixing in peri-urban and rural areas.  
105 This is also presumably the case for directly transmitted pathogens, but with a potentially even  
106 stronger discrepancy for dengue due to the urban-rural gradient in mosquito densities.

107

108 To assess the potential for spatial variation in the inhomogeneity of mixing as it pertains  
109 dengue transmission, we performed an analysis of district-level time series of dengue  
110 transmission in the Punjab province of Pakistan using a TSIR model with separate mixing  
111 parameters for urban and rural districts. We likewise made estimates of the relationships

112 between density-independent transmission potential and putative drivers thereof, such as  
113 temperature, to allow for the relative roles of extrinsic and intrinsic factors to be teased apart.  
114 Finally, we performed mathematical analyses of the fitted model to assess the significance of  
115 spatial variation in mixing inhomogeneity for how time series data are interpreted and used to  
116 guide control efforts.

117

## 118 **Material and Methods:**

119

120 We obtained daily dengue case data aggregated at hospital level from Punjab province  
121 provided by the Health Department Punjab, Pakistan between 2011 and 2014. In total, 41,300  
122 suspected and confirmed dengue cases were reported in 109 hospitals. All hospitals were  
123 subsequently geo-located using 'Google maps' (<http://www.maps.google.com>). Hospitals that  
124 could not be identified were removed from the database. 21,182 cases alone were reported  
125 from the year 2011, which affected the almost the entire province. Many more cases occurred  
126 in Lahore (35,348) compared to all other districts (5,952) (Table 1). A breakdown per year and  
127 each province is provided in Table S1 and additional information about collection can be found  
128 in the supplementary appendix.

129

### 130 *Covariate selection and processing:*

131 Environmental conditions are instrumental in defining the risk of transmission of dengue (Bhatt  
132 *et al.* 2013). Transmission is limited by the availability of a competent disease vector. Due to a  
133 lack of resources and political instability no comprehensive nation wide entomological surveys  
134 have been performed in Pakistan. Therefore we use a probabilistic model to infer the  
135 probability of occurrence of *Ae. aegypti* and *Ae. albopictus* in Pakistan derived from a globally  
136 comprehensive dataset containing more than 20,000 records for each species (Figure 1a and  
137 b). Such model outputs have proven useful in identifying areas of risk of transmission of  
138 dengue as well as malaria (Gething *et al.* 2011; Sinka *et al.* 2012; Bhatt *et al.* 2013). Other  
139 important environmental conditions defining the risk of transmission of dengue are  
140 temperature, water availability, and vegetation cover (Messina *et al.* 2015). To account for such  
141 variation, raster layers of daytime land surface temperature (LST) were processed from the  
142 MOD11A2 satellite, gap-filled to remove missing values, and then averaged to a monthly  
143 temporal resolution for all four years (Weiss *et al.* 2015). The density of vegetation coverage  
144 has been shown to be associated with vector abundance (Eisen & Lozano-Fuentes 2009).  
145 Moreover, vegetation indices are useful proxies for precipitation and may be used to derive the

146 presence of standing water buckets that are habitats for the *Aedes* mosquitos (Maciel-de-  
147 Freitas *et al.* 2007). The same method was again applied to derive the Enhanced Vegetation  
148 Index (EVI) from the MOD11A2 satellite to produce 16 day and monthly pixel based estimates  
149 for 2011-2014 (Figure 1g) (Weiss *et al.* 2014a). Due to the inherent delay between rainfall and  
150 daily temperature influencing mosquito population dynamics and those mosquitoes contributing  
151 to an increase in DENV transmission, we consider both, the influence of the current  
152 temperature, vegetation indices and precipitation, data on current transmission as well as the  
153 values of those covariates the time step before (Figure 1f).

154 We used population count estimates on a 100m resolution that were subsequently aggregated  
155 up to match all other raster layers to a 5 km x 5 km resolution for the year 2015  
156 (<http://www.worldpop.org>) (Figure 1e). In a follow-up analysis to our primary investigation into  
157 the climatological drivers of dengue transmission we included several density-based  
158 covariates. We derived a weighted accessibility metric that includes both, population density  
159 and urban accessibility, a metric commonly used to derive relative movement patterns (Uchida  
160 & Nelson 2008; Tatem *et al.* 2012). This map shows a friction surface, i.e. the time needed to  
161 travel through a specific pixel (Figure 1d). We also used an urban, peri-urban and rural  
162 classification scheme to quantify patterns of urbanicity based on a globally available grid  
163 (Center for International Earth Science Information Network (CIESIN) 2010) (Figure 1c). All  
164 covariates and case data were aggregated and averaged (where appropriate) to a district level.

165

166 *Model:*

167 Following Finkenstädt & Grenfell (2000), we assume a general transmission model of

168 
$$I_{t,i} = \beta_{t,i} \cdot \frac{I_{t-1,i}^{\alpha_i}}{N_i} \cdot S_{t-1,i} \cdot \epsilon_{t,i}, \quad (1)$$

169

170 where  $I_{t,i}$  is the number of infected and infectious individuals and  $S_{t,i}$  the number of susceptible  
171 individuals, at time  $t$  in district  $i$ ,  $N_i$  is the population of district  $i$ , and  $\beta_{t,i}$  is the covariate driven  
172 contact rate. The mixing parameter for the  $i$ th district is given by  $\alpha_i$ ; when  $\alpha_i$  is equal to 1, the  
173 population has homonegeous mixing where values less than one can either indicate  
174 inhomogeneous mixing or a need to correct for the discretization of the continuous-time  
175 process. Finally, the error terms  $\epsilon_{t,i}$  are assumed to be independent and identically log-  
176 normally distributed random variables. For more details please see SI.

177

178 *Model selection:*

179 The term  $\beta_{t,i}$  is fit using generalized additive model regression (GAM) (Hastie & Tibshirani  
180 1990; Dominici *et al.* 2002; Wood 2011). The time-varying climatological covariates are all fit as  
181 a smooth spline, while all other covariates enter  $\beta_{t,i}$  linearly. Additionally, unexplained  
182 seasonal variation is accounted for using a 12-month periodic smooth spline.

183

184 Model selection was performed using backwards selection. Two base models were  
185 investigated. First, a climate only model was created using only the climatological and climate  
186 suitability covariates. Second, a “full” model using the density-dependent covariates as well as  
187 the climatological covariates were combined into a single model which was then subjected to  
188 backwards selection. For both models the mixing coefficient was initially set equal for each  
189 district and once a final model was arrived upon, the mixing coefficient for Lahore was allowed  
190 to vary separately from the other coefficients. All model fitting was conducted using R (R Core  
191 Team 2014) and the “mgcv” package (Wood 2011). Models are fit by maximizing the restricted  
192 maximum likelihood (Patterson & Thompson 1971) to reduce bias and over-fitting of the  
193 smooth splines. The model source code and processing of covariates will be made available in  
194 line with previous projects (Pigott & Kraemer 2014).

195

196 *Model analysis:*

197 To explore the potential significance of spatial variation in mixing parameters, we conducted an  
198 analysis to probe the inherent mathematical tradeoff between the mixing parameter  $\alpha$  and the  
199 density-independent transmission coefficient  $\beta$ . Specifically, to answer the question, what  
200 difference in local transmission would be necessary to account for a difference in mixing while  
201 achieving identical transmission dynamics. To explore this, we used eqn. (1) to establish:

202 
$$\beta_1 \frac{I_{1,t}^{\alpha_1}}{N_1} = \beta_2 \frac{I_{2,t}^{\alpha_2}}{N_2} \quad (2),$$

203 from which we obtained

204 
$$\frac{\beta_1}{\beta_2} = I^{\alpha_2 - \alpha_1} \quad (3).$$

205 We then examined how variation in  $I$  and  $\alpha_2 - \alpha_1$  affected the left hand side of eqn. (3) and  
206 likewise the critical proportion of the population to control in order to effect pathogen  
207 elimination, which, under our model, is  $p_c = 1 - \frac{1}{\beta}$ .

208

209 **Results:**

210 *Description of case distribution:*

211 The majority of cases are clustered in Lahore, the capital of Punjab province. Ongoing  
212 transmission seems to be focal in three (Vehari, Rawalpindi and Lahore) districts and spread  
213 through infective sparks to smaller more rural provinces. In early investigations, all hospitals  
214 that reported dengue cases are located in areas with high EVI values indicating a clear  
215 environmental signal (Figure 1b).

216

217 *Model selection:*

218 To disentangle the different aspects of dengue dynamics and their drivers we used a model  
219 containing only the climatological covariates and performing backwards model selection until  
220 each covariate in the model was significant at a 5% level resulted in a model that explained  
221 76.9% of the deviance and whose adjusted R-squared was 0.746. Amongst the yearly-  
222 averaged covariates, EVI and precipitation remained in the model as well as the derived *Ae.*  
223 *albopictus* range map (p-values of  $8.21 \times 10^{-4}$ , 0.01, and  $3.9 \times 10^{-5}$  respectively). Interestingly, if  
224 the derived *Ae. aegypti* map is substituted for the *Ae. albopictus* map, the deviance explained  
225 increases slightly to 76.8%. For climatological covariates that were fit as smooth splines,  
226 temperature, lagged temperature and EVI remained in the model (Figure 2, p-values of 0.010,  
227 0.030 and 0.030 with effective degrees of freedom 7.55, 5.47, and 1.83, respectively). There  
228 was a significant amount of periodic variation unexplained by the climatological covariates  
229 alone and the 'seasonality' covariate remained (Figure 2, p-value = 0.0034). The estimated  
230 median values for  $R_0$  per district are clustered around two (mean = 2.1), their geographical  
231 distribution indicates a clear trend towards districts with higher population (Figure 3). Finally,  
232 the mixing coefficient was significantly lower than 1 ( $\alpha = 0.69$ , 95% CI = (0.614, 0.771), p-  
233 value =  $1.6 \times 10^{-14}$ ).

234

235 To understand these differences the final model was then compared to a nested model where  
236 the coefficient for Lahore was allowed to vary independently of all other districts. Deviance  
237 explained increased to 77% and adjusted R-squared increased to 0.753. Further, the mixing  
238 coefficient for Lahore ( $\alpha = 0.74$ ) was significantly larger than the mixing coefficient for the  
239 other districts ( $\alpha = 0.59$ , p-value=0.0068) (Figure S1). The median  $R_0$  for Lahore was  
240 estimated at 3.28, the highest for all districts.

241

242 In assess how far the variation of mixing coefficients can be explained by other covariates we  
243 consider the possibility that movement accounts for the differences in the mixing coefficient  
244 between Lahore and the other districts. The density-dependent covariates (described earlier)

245 were then added to the full model and backwards selection was repeated. The resulting model  
246 explained 78.6% of the variance, had an adjusted R-squared of 0.763 and is superior to the  
247 final climatological model based on AIC (699.23 versus 714.83). Yearly averaged EVI, NDVI  
248 and precipitation were all significant (p-values of  $8.7 \times 10^{-5}$ , 0.00024, and 0.00028,  
249 respectively). Again, the derived *Ae. albopictus* map was significant (p-value = 0.008163). For  
250 climatological covariates fit as smooth splines, only temperature and lagged temperature were  
251 found significant (Figure 2b, p-value of  $4.0 \times 10^{-5}$  and 0.0013, and effective degrees of freedom  
252 7.61 and 4.81, respectively), and there was still a significant 'seasonality' (Figure 2b, p-value of  
253  $4.0 \times 10^{-7}$ , effective degrees of freedom 4.48). The mixing coefficient was fit at  $\alpha = 0.58$ ,  
254 barely lower than the mixing coefficient for non-Lahore districts in the climatological model. The  
255 estimated median  $R_0$  again clustered around 2 (mean = 1.8), and again the  $R_0$  for Lahore was  
256 largest, but in this model it was considerably larger than in the climatological model (Lahore  $R_0$   
257 = 7.82, Figure 2b). Full details of the model parameters are shown in Table S2-S5.

258

259 Two of the density-dependent covariates remained in the model: the urban map (p-value =  
260 0.01) and the weighted access map (p-value=  $3 \times 10^{-5}$ ). When the nested model that allows  
261 Lahore's mixing coefficient to vary was fit, there was no significant difference in the two mixing  
262 coefficients (p-value $\approx$ 1).

263

264 *Model analysis:*

265 Given a difference in estimates of the mixing parameters between Lahore and elsewhere of  
266 0.15, we analyzed eqn. (3) to assess the bias in estimates of the transmission coefficient that  
267 would result from ignoring this extent of variation in the inhomogeneity of mixing displayed  
268 between two areas. For the purpose of *ceteris paribus* comparisons, we assumed equal force  
269 of infection but varied it across several orders of magnitude. Depending on the order of  
270 magnitude, estimates of transmission coefficients made if overestimating the mixing parameter  
271 by 0.15 could easily result in a two- to three-fold underestimate in the transmission coefficient  
272 (Figure 4). For realistic ranges of the transmission coefficient for dengue, and more generally  
273 the basic reproductive number  $R_0$ , this extent of underestimation of  $R_0$  could lead to  
274 underestimating the critical proportion of the population to which vaccines or other control  
275 measures must be applied by 20-30% (Figure 5).

276

277 **Discussion:**



278 Our results point to considerable spatial heterogeneity in the extent of mixing and strength of  
279 an associated nonlinearity in transmission along an urban-rural gradient. This regional  
280 variability in mixing has direct implications for estimates of the basic reproductive number of  
281 dengue in our study region and elsewhere. Although the potential for such bias in estimates of  
282 the basic reproductive number has been shown in a theoretical context (Hu *et al.* 2013; Perkins  
283 *et al.* 2013), we provide quantitative estimates of the extent of this problem in interfacing  
284 models with a rich spatio-temporal data set. Such analyses have implications for estimates of  
285 population-level parameters not only for dengue but also for other infectious diseases (Bartlett  
286 1960; Keeling & Grenfell 1997; Bjørnstad *et al.* 2002; Smith *et al.* 2002; Keeling & Eames  
287 2005; Kiss *et al.* 2008) and possibly even more broadly in ecology.

288

289 We revealed significant differences in mixing components between urban and rural settings  
290 and found that a population-weighted urban accessibility metric was able to absorb differences  
291 in mixing between these settings indicating that this specific covariate accounts for aspects  
292 influencing mixing. Mixing is presumably influenced directly by human behavior and has been  
293 shown to be highly unpredictable, largely dependent on the local context and the spatial and  
294 temporal scale (Yang *et al.* 2014). In this study however we could show that the density-  
295 dependent covariate selected was able to capture the influence of these key encounters on a  
296 district level. Once differences in mixing were accounted for, estimated  $R_0$  values indicated  
297 considerably larger differences between transmission potential in Lahore versus all other  
298 districts. Synchronizing more accurate geo-referenced data would allow to assess the  
299 importance of spatial scale on the relationship between “mixing parameters” and urban  
300 accessibility (Perkins *et al.* 2013; Mills & Riley 2014). In the case of dengue this again has  
301 been limited by the availability of high resolution data (Ruberto *et al.* 2015). Complementing  
302 this analysis with measurement of direct social contact patterns could be important to explore  
303 this relationship in even more detail (Bauch & Galvani 2013; Vazquez-Prokopec *et al.* 2013;  
304 Heesterbeek *et al.* 2015) and could be informed by mathematical models that explored this  
305 relationship previously for other diseases (Bjørnstad *et al.* 2002; Reiner *et al.* 2012). Another  
306 encouraging finding is that large-scale mosquito suitability surfaces help capture the  
307 environmental determinants of dengue transmission (Bhatt *et al.* 2013).

308

309 Intervention strategies are contingent on both understanding key environmental drivers of  
310 transmission and the dynamics of ongoing human-to-human transmission, particularly in  
311 outbreaks situations (Perkins *et al.* 2015). Environmental drivers such as seasonal fluctuations

312 in rainfall, temperature, vegetation coverage or mosquito abundance will help guide  
313 surveillance and control efforts targeted mostly towards the ecological aspects of mosquito  
314 dispersal (Johansson 2015). Once infection occurs much debate has been focused around  
315 optimizing intervention strategies to reduce disease incidence, which is largely determined by  
316  $R_0$ . The presented framework shows that the interaction between mixing parameters and force  
317 of infection has potentially large implications for optimizing targeted intervention, particularly in  
318 countries where resources are scarce (Cesare *et al.* 2015). This in fact is even more important  
319 in areas of low infection where transmission seems to be more focal (Salje *et al.* 2012). Again  
320 however importance needs to be focused on the spatial and temporal resolution of appropriate  
321 intervention strategies and the respective effect of the selected covariates and model  
322 parameters (Mills & Riley 2014). Empirical understanding, however, on which spatial resolution  
323 is most appropriate to carry out large-scale vector-borne disease interventions remains  
324 unknown.

325

326 Once transmission has occurred in one place, understanding not only spatial heterogeneities of  
327 transmission dynamics but their subsequent spread in mechanistic stochastic models as shown  
328 for measles would help to empirically determine the propagation of the disease (Grenfell *et al.*  
329 2001). The spatial spread dynamics have been given considerable interest globally as the risk  
330 of importation of dengue into yet endemic areas continentally and internationally is increasing  
331 with travel and trade (Schaffner & Mathis 2014). Exploration of the case data in Pakistan  
332 suggests that spread happens along major transport routes from Lahore to Karachi and north  
333 to Rawalpindi. Using results presented here on mixing components and environmental drivers  
334 will help pinpoint areas of major risk of importation more accurately especially in the case of  
335 recurring epidemics. Using the fitted relationships of the environmental drivers of transmission  
336 and  $R_0$  will enable future analyses and comparisons between diseases and geographic regions.  
337 In this context it will be instrumental to integrate a variety of movement and social network  
338 models with the evidence presented here to infer more accurately how the geographical spread  
339 of dengue is determined.

340

341 To allow for comparison of these results in a broader context and across diseases, possibly  
342 even in outbreak situations and in real time, it is essential to make data widely available by  
343 open access (Heesterbeek *et al.* 2015). Moreover, the complexity of infectious disease  
344 dynamics is not fully understood and we are limited by computational capacities to fully account  
345 for stochasticity and nonlinearity.

346

347 **Author contributions:**

348 Conceived and designed the experiment: MUGK, RCR, TAP, DLS. Performed the experiments:  
349 RCR, TAP, MUGK. Analysed the data: RCR, MUGK. Edited the manuscript: DLS, SIH, DATC,  
350 ZR. Wrote the paper: MUGK, RCR, TAP.

351

352 **Acknowledgements and funding:**

353

354 The authors would like to thank the WHO Punjab office, Health Department Punjab, and PID  
355 for providing the epidemiological data, and all participants that helped collect the data. MUGK  
356 acknowledges funding from the German Academic Exchange Service (DAAD). TAP, SIH, RCR  
357 acknowledge the support from the RAPIDD program of the Science & Technology Directorate,  
358 Department of Homeland Security, and the Fogarty International Center, National Institutes of  
359 Health. SIH is funded by a Senior Research Fellowship from the Wellcome Trust (#095066)  
360 and a grant from the Bill & Melinda Gates Foundation (#OPP1093011). Funders had no role in  
361 study design, data collection and analysis, decision to publish, or preparation of the  
362 manuscript.

363

364

365 **References:**

366

1.

367 Akram, W., Hafeez, F., Ullah, U.N., Kim, Y.K., Hussain, A. & Lee, J.J. (2009). Seasonal  
368 distribution and species composition of daytime biting mosquitoes. *Entomol. Res.*, 39, 107–13.

369

2.

370 Allicock, O.M., Lemey, P., Tatem, A.J., Pybus, O.G., Bennett, S.N., Mueller, B. a., *et al.* (2012).  
371 Phylogeography and population dynamics of dengue viruses in the Americas. *Mol. Biol. Evol.*,  
372 29, 1533–43.

373

3.

374 Anderson, R.M. & May, R.M. (1991). *Infectious diseases of humans: dynamics and control*.  
375 Oxford University Press, Oxford, U.K.

376

4.

377 Bartlett, M.S. (1960). The critical community size for measles in the U.S. *J. R. Stat. Soc. A*,  
378 123, 37–44.

379

5.

380 Bauch, C.T. & Galvani, A.P. (2013). Epidemiology. Social factors in epidemiology. *Science*,  
381 342, 47–9.

382

6.

383 Bharti, N., Tatem, a J., Ferrari, M.J., Grais, R.F., Djibo, A. & Grenfell, B.T. (2011). Explaining  
384 seasonal fluctuations of measles in Niger using nighttime lights imagery. *Science*, 334, 1424–7.

385

7.

386 Bhatt, S., Gething, P.W., Brady, O.J., Messina, J.P., Farlow, A.W., Moyes, C.L., *et al.* (2013).  
387 The global distribution and burden of dengue. *Nature*, 496, 504–7.

388

8.

389 Bhoomiboonchoo, P., Gibbons, R. V., Huang, A., Yoon, I.-K., Buddhari, D., Nisalak, A., *et al.*  
390 (2014). The spatial dynamics of Dengue virus in Kamphaeng Phet, Thailand. *PLoS Negl. Trop.*  
391 *Dis.*, 8, e3138.

392

9.

393 Bjørnstad, O.N., Finkenstädt, B.F. & Grenfell, B.T. (2002). Dynamics of measles epidemics:  
394 Estimating scaling of transmission rates using a Time Series SIR model. *Ecol. Monogr.*, 72,  
395 169–84.

- 396 10.  
397 Brady, O.J., Gething, P.W., Bhatt, S., Messina, J.P., Brownstein, J.S., Hoen, A.G., *et al.*  
398 (2012). Refining the global spatial limits of dengue virus transmission by evidence-based  
399 consensus. *PLoS Negl. Trop. Dis.*, 6, e1760.  
400 11.  
401 Brockmann, D. & Helbing, D. (2013). The hidden geometry of complex, network-driven  
402 contagion phenomena. *Science*, 342, 1337–42.  
403 12.  
404 Cauchemez, S., Bhattarai, A., Marchbanks, T.L., Fagan, R.P., Ostroff, S., Ferguson, N.M., *et*  
405 *al.* (2011). Role of social networks in shaping disease transmission during a community  
406 outbreak of 2009 H1N1 pandemic influenza. *Proc. Natl. Acad. Sci.*, 108, 2825–30.  
407 13.  
408 Center for International Earth Science Information Network (CIESIN). (2010). *Gridded*  
409 *Population of the World, version 3 (GPWv3) and the Global Rural-Urban Mapping Project*  
410 *(GRUMP)*.  
411 14.  
412 Cesare, M. Di, Bhatti, Z., Soofi, S.B., Fortunato, L., Ezzati, M. & Bhutta, Z. a. (2015).  
413 Geographical and socioeconomic inequalities in women and children’s nutritional status in  
414 Pakistan in 2011: an analysis of data from a nationally representative survey. *Lancet Glob.*  
415 *Heal.*, 3, e229–39.  
416 15.  
417 Deville, P., Linard, C., Martin, S., Gilbert, M., Stevens, F.R., Gaughan, a. E., *et al.* (2014).  
418 Dynamic population mapping using mobile phone data. *Proc. Natl. Acad. Sci.*, 111, 15888–93.  
419 16.  
420 Dominici, F., McDermott, A., Zeger, S.L. & Samet, J.M. (2002). On the use of generalized  
421 additive models in time-series studies of air pollution and health. *Am. J. Epidemiol.*, 156, 193–  
422 203.  
423 17.  
424 Eisen, L. & Lozano-Fuentes, S. (2009). Use of mapping and spatial and space-time modeling  
425 approaches in operational control of *Aedes aegypti* and dengue. *PLoS Negl. Trop. Dis.*, 3,  
426 e411.  
427 18.  
428 Fenichel, E.P., Castillo-Chavez, C., Ceddia, M.G., Chowell, G., Parra, P. a G., Hickling, G.J., *et*  
429 *al.* (2011). Adaptive human behavior in epidemiological models. *Proc. Natl. Acad. Sci.*, 108,  
430 6306–11.  
431 19.  
432 Finkenstädt, B.F. & Grenfell, B.T. (2000). Time series modelling of childhood diseases: a  
433 dynamical systems approach. *Appl. Stat.*, 49, 187–205.  
434 20.  
435 Gething, P.W., Patil, A.P., Smith, D.L., Guerra, C. a, Elyazar, I.R.F., Johnston, G.L., *et al.*  
436 (2011). A new world malaria map: *Plasmodium falciparum* endemicity in 2010. *Malar. J.*, 10,  
437 378.  
438 21.  
439 Gilbert, M., Golding, N., Zhou, H., Wint, G.R.W., Robinson, T.P., Tatem, A.J., *et al.* (2014).  
440 Predicting the risk of avian influenza A H7N9 infection in live-poultry markets across Asia. *Nat.*  
441 *Commun.*, 5, 4116.  
442 22.  
443 Glass, K., Xia, Y. & Grenfell, B.T. (2003). Interpreting time-series analyses for continuous-time  
444 biological models - Measles as a case study. *J. Theor. Biol.*, 223, 19–25.  
445 23.

- 446 Grenfell, B.T., Björnstad, O.N. & Kappey, J. (2001). Travelling waves and spatial hierarchies in  
447 measles epidemics. *Nature*, 414, 716–23.  
448 24.
- 449 Grenfell, B.T., Pybus, O.G., Gog, J.R., Wood, J.L.N., Daly, J.M., Mumford, J. a, *et al.* (2004).  
450 Unifying the epidemiological and evolutionary dynamics of pathogens. *Science*, 303, 327–32.  
451 25.
- 452 Harrington, L.C., Scott, T.W., Lerdthusnee, K., Coleman, R.C., Costero, A., Clark, G.G., *et al.*  
453 (2005). Dispersal of the dengue vector *Aedes aegypti* within and between rural communities.  
454 *Am. J. Trop. Med. Hyg.*, 72, 209–20.  
455 26.
- 456 Hastie, T.J. & Tibshirani, R.J. (1990). *Generalized additive models*. Vol. 43. CRC Press.  
457 27.
- 458 Heesterbeek, H., Anderson, R.M., Andreasen, V., Bansal, S., De Angelis, D., Dye, C., *et al.*  
459 (2015). Modeling infectious disease dynamics in the complex landscape of global health.  
460 *Science*, 347, aaa4339.  
461 28.
- 462 Hu, H., Nigmatulina, K. & Eckhoff, P. (2013). The scaling of contact rates with population  
463 density for the infectious disease models. *Math. Biosci.*, 244, 125–34.  
464 29.
- 465 Johansson, M.A. (2015). Chikungunya on the move. *Trends Parasitol.*, 31, 43–45.  
466 30.
- 467 Keeling, M.J. & Eames, K.T.D. (2005). Networks and epidemic models. *J. R. Soc. Interface*, 2,  
468 295–307.  
469 31.
- 470 Keeling, M.J. & Grenfell, B.T. (1997). Disease extinction and community size: modeling the  
471 persistence of measles. *Science*, 275, 65–7.  
472 32.
- 473 Kilpatrick, A.M., Daszak, P., Jones, M.J., Marra, P.P. & Kramer, L.D. (2006). Host  
474 heterogeneity dominates West Nile virus transmission. *Proc. Biol. Sci.*, 273, 2327–33.  
475 33.
- 476 Kiss, I.Z., Green, D.M. & Kao, R.R. (2008). The effect of network mixing patterns on epidemic  
477 dynamics and the efficacy of disease contact tracing. *J. R. Soc. Interface*, 5, 791–9.  
478 34.
- 479 Koelle, K. & Pascual, M. (2004). Disentangling extrinsic from intrinsic factors in disease  
480 dynamics: A nonlinear time series approach with an application to Cholera. *Am. Nat.*, 163,  
481 901–13.  
482 35.
- 483 Lessler, J., Rodriguez, I., Derek, B., Tini, A.T.C., Kerkhove, M. Van, Mills, H., *et al.* (2014).  
484 Estimating potential incidence of MERS CoV associated with Hajj pilgrims to Saudi Arabia,  
485 2014. *PLOS Curr. Outbreaks*, November 2.  
486 36.
- 487 Liu, W.M., Hethcote, H.W. & Levin, S. a. (1987). Dynamical behavior of epidemiological models  
488 with nonlinear incidence rates. *J. Math. Biol.*, 25, 359–380.  
489 37.
- 490 Maciel-de-Freitas, R., Marques, W. a., Peres, R.C., Cunha, S.P. & De Oliveira, R.L. (2007).  
491 Variation in *Aedes aegypti* (Diptera: Culicidae) container productivity in a slum and a suburban  
492 district of Rio de Janeiro during dry and wet seasons. *Mem. Inst. Oswaldo Cruz*, 102, 489–96.  
493 38.
- 494 Messina, J.P., Brady, O.J., Pigott, D.M., Golding, N., Kraemer, M.U.G., Scott, T.W., *et al.*  
495 (2015). The many projected futures of dengue. *Nat. Rev. Microbiol.*, 13, 230–39.

496 39.  
497 Metcalf, C.J.E., Bjornstad, O.N., Ferrari, M.J., Klepac, P., Bharti, N., Lopez-Gatell, H., *et al.*  
498 (2011). The epidemiology of rubella in Mexico: seasonality, stochasticity and regional variation.  
499 *Epidemiol. Infect.*, 139, 1029–38.  
500 40.  
501 Mills, H.L. & Riley, S. (2014). The spatial resolution of epidemic peaks. *PLoS Comput. Biol.*, 10,  
502 e1003561.  
503 41.  
504 Morrison, A.C., Zielinski-Gutierrez, E., Scott, T.W. & Rosenberg, R. (2008). Defining challenges  
505 and proposing solutions for control of the virus vector *Aedes aegypti*. *PLoS Med.*, 5, e68.  
506 42.  
507 Pascual, M. & Levin, S. a. (1999). From individuals to population densities: searching for the  
508 scale of intermediate determinism. *Ecology*, 80, 2225–36.  
509 43.  
510 Patterson, H.D. & Thompson, R. (1971). Recovery of inter-block information when block sizes  
511 are unequal. *Biometrika*, 58, 545–54.  
512 44.  
513 Perkins, T.A., Metcalf, C.J.E., Grenfell, B.T. & Tatem, A.J. (2015). Estimating Drivers of  
514 Autochthonous Transmission of Chikungunya Virus in its Invasion of the Americas. *PLoS Curr.*,  
515 7, ecurrents.outbreaks.a4c7b6ac10e0420b1788c9767946d1.  
516 45.  
517 Perkins, T.A., Scott, T.W., Le Menach, A. & Smith, D.L. (2013). Heterogeneity, mixing, and the  
518 spatial scales of mosquito-borne Ppathogen transmission. *PLoS Comput. Biol.*, 9, e1003327.  
519 46.  
520 Pigott, D.M. & Kraemer, M.U. (2014). Enhancing infectious disease mapping with open access  
521 resources. *Eurosurveillance*, 19, pii=20989.  
522 47.  
523 R Core Team. (2014). R: A language and environment for computing. Vienna, Austria. *R*  
524 *Found. Stat. Comput.*  
525 48.  
526 Read, J.M., Lessler, J., Riley, S., Wang, S., Tan, L.J., Kwok, K.O., *et al.* (2014). China social  
527 mixing patterns in rural and urban areas of southern China. *Proc. R. Soc. B*, 281, 20140268.  
528 49.  
529 Reich, N.G., Shrestha, S., King, A. a, Rohani, P., Lessler, J., Kalayanarooj, S., *et al.* (2013).  
530 Interactions between serotypes of dengue highlight epidemiological impact of cross-immunity.  
531 *J. R. Soc. Interface*, 10, 20130414.  
532 50.  
533 Reiner, R.C., King, A. a, Emch, M., Yunus, M., Faruque, a S.G. & Pascual, M. (2012). Highly  
534 localized sensitivity to climate forcing drives endemic cholera in a megacity. *Proc. Natl. Acad.*  
535 *Sci.*, 109, 2033–6.  
536 51.  
537 Reiner, R.C., Stoddard, S.T. & Scott, T.W. (2014). Socially structured human movement  
538 shapes dengue transmission despite the diffusive effect of mosquito dispersal. *Epidemics*, 6,  
539 30–6.  
540 52.  
541 Ruberto, I., Marques, E., Burke, D.S. & Van Panhuis, W.G. (2015). The availability and  
542 consistency of dengue surveillance data Pprovided online by the World Health Organization.  
543 *PLoS Negl. Trop. Dis.*, 9, e0003511.  
544 53.

545 Salathé, M., Kazandjieva, M., Woo, J., Levis, P., Feldman, M.W. & Jones, J.H. (2010). A high-  
546 resolution human contact network for infectious disease transmission. *Proc. Natl. Acad. Sci.*,  
547 107, 22020–5.  
548 54.  
549 Salje, H., Lessler, J., Endy, T.P., Curriero, F.C., Gibbons, R. V., Nisalak, A., *et al.* (2012).  
550 Revealing the microscale spatial signature of dengue transmission and immunity in an urban  
551 population. *Proc. Natl. Acad. Sci.*, 109, 9535–8.  
552 55.  
553 Schaffner, F. & Mathis, A. (2014). Dengue and dengue vectors in the WHO European region:  
554 past, present, and scenarios for the future. *Lancet. Infect. Dis.*, 14, 1271–80.  
555 56.  
556 Shaman, J., Pitzer, V.E., Viboud, C., Grenfell, B.T. & Lipsitch, M. (2010). Absolute humidity and  
557 the seasonal onset of influenza in the continental United States. *PLoS Biol.*, 8.  
558 57.  
559 Simini, F., González, M.C., Maritan, A. & Barabási, A.-L. (2012). A universal model for mobility  
560 and migration patterns. *Nature*, 484, 96–100.  
561 58.  
562 Sinka, M.E., Bangs, M.J., Manguin, S., Rubio-Palis, Y., Chareonviriyaphap, T., Coetzee, M., *et*  
563 *al.* (2012). A global map of dominant malaria vectors. *Parasit. Vectors*, 5, 69.  
564 59.  
565 Smith, D.L., Lucey, B., Waller, L. a, Childs, J.E. & Real, L. a. (2002). Predicting the spatial  
566 dynamics of rabies epidemics on heterogeneous landscapes. *Proc. Natl. Acad. Sci.*, 99, 3668–  
567 72.  
568 60.  
569 Stoddard, S.T., Forshey, B.M., Morrison, A.C., Paz-Soldan, V. a, Vazquez-Prokopec, G.M.,  
570 Astete, H., *et al.* (2013). House-to-house human movement drives dengue virus transmission.  
571 *Proc. Natl. Acad. Sci.*, 110, 994–9.  
572 61.  
573 Stoddard, S.T., Morrison, A.C., Vazquez-Prokopec, G.M., Paz Soldan, V., Kochel, T.J., Kitron,  
574 U., *et al.* (2009). The role of human movement in the transmission of vector-borne pathogens.  
575 *PLoS Negl. Trop. Dis.*, 3.  
576 62.  
577 Tatem, A.J., Hemelaar, J., Gray, R.R. & Salemi, M. (2012). Spatial accessibility and the spread  
578 of HIV-1 subtypes and recombinants. *AIDS*, 26, 2351–60.  
579 63.  
580 Uchida, H. & Nelson, A. (2008). *Agglomeration index: towards a new measure of urban*  
581 *concentration*. Washington D.C.  
582 64.  
583 Vazquez-Prokopec, G.M., Bisanzio, D., Stoddard, S.T., Paz-Soldan, V., Morrison, A.C., Elder,  
584 J.P., *et al.* (2013). Using GPS technology to quantify human mobility, dynamic contacts and  
585 infectious disease dynamics in a resource-poor urban environment. *PLoS One*, 8, e58802.  
586 65.  
587 Weiss, D.J., Atkinson, P.M., Bhatt, S., Mappin, B., Hay, S.I. & Gething, P.W. (2014a). An  
588 effective approach for gap-filling continental scale remotely sensed time-series. *ISPRS J.*  
589 *Photogramm. Remote Sens.*, 98, 106–18.  
590 66.  
591 Weiss, D.J., Bhatt, S., Mappin, B., Van Boeckel, T.P., Smith, D.L., Hay, S.I., *et al.* (2014b). Air  
592 temperature suitability for *Plasmodium falciparum* malaria transmission in Africa 2000–2012: a  
593 high-resolution spatiotemporal prediction. *Malar. J.*, 13, 171.  
594 67.

595 Weiss, D.J., Mappin, B., Dalrymple, U., Bhatt, S., Cameron, E., Hay, S.I., *et al.* (2015). Re-  
596 examining environmental correlates of *Plasmodium falciparum* malaria endemicity: a data-  
597 intensive variable selection approach. *Malar. J.*, 14, 1–18.  
598 68.  
599 Wood, S.N. (2011). Fast stable restricted maximum likelihood and marginal likelihood  
600 estimation of semiparametric generalized linear models. *J. R. Stat. Soc. Ser. B Stat. Methodol.*,  
601 73, 3–36.  
602 69.  
603 Yang, Y., Herrera, C., Eagle, N. & González, M.C. (2014). Limits of predictability in commuting  
604 flows in the absence of data for calibration. *Sci. Rep.*, 4, 5662.  
605



606 **Table 1: Reported cases by year in Lahore and all other districts.**

|        | 2011   | 2012  | 2013   | 2014  | Total  |
|--------|--------|-------|--------|-------|--------|
| Lahore | 18,020 | 4,013 | 11,516 | 1,799 | 35,348 |
| Other  | 3,162  | 500   | 2,356  | 2,790 | 5,952  |

607

608 **Figure 1: Covariates used in this study to derive environmental drivers of transmission.**

609 ***Aedes aegypti* probability of occurrence (a); *Ae. albopictus* probability of occurrence**

610 **(b); Urbanicity (c); Weighted urban accessibility (d); Population density and study area**

611 **(e); Precipitation (f); Enhanced Vegetation Index (EVI) mean (g).**

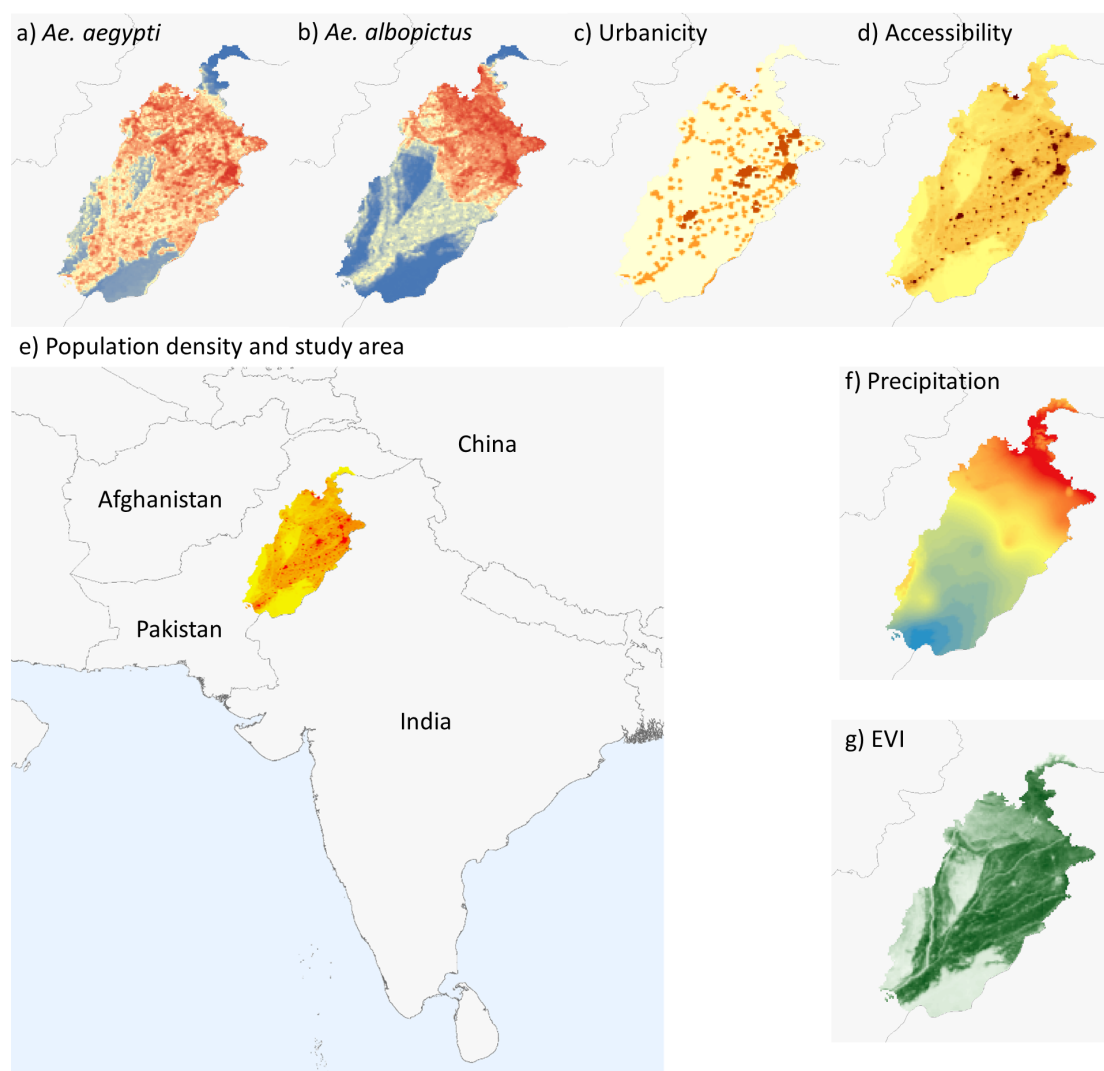

612

613

614 **Figure 2: Model outputs using a backwards model selection procedure in the model**  
615 **using climatological variables (a, A-D), and including the density dependent variables (b,**  
616 **A-D).**

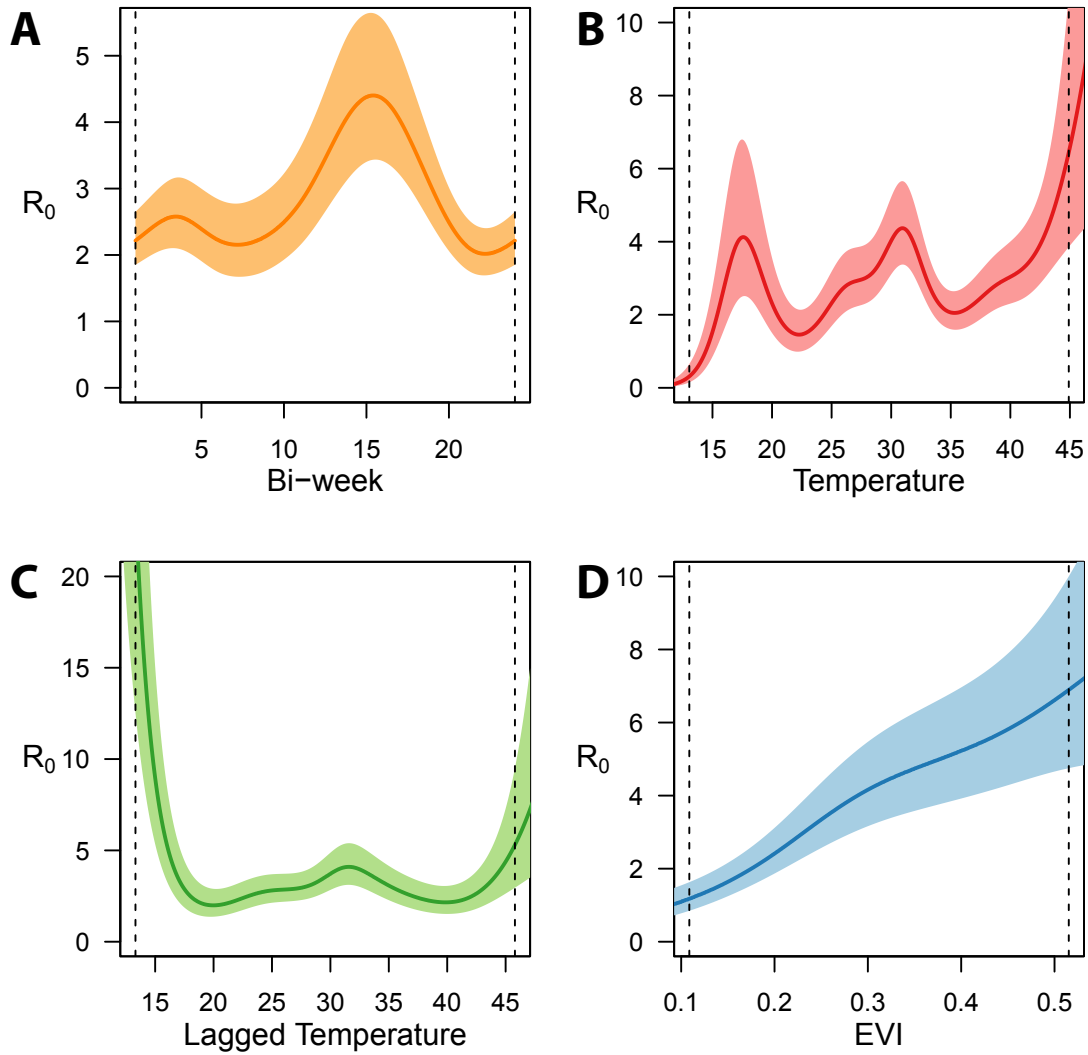

617

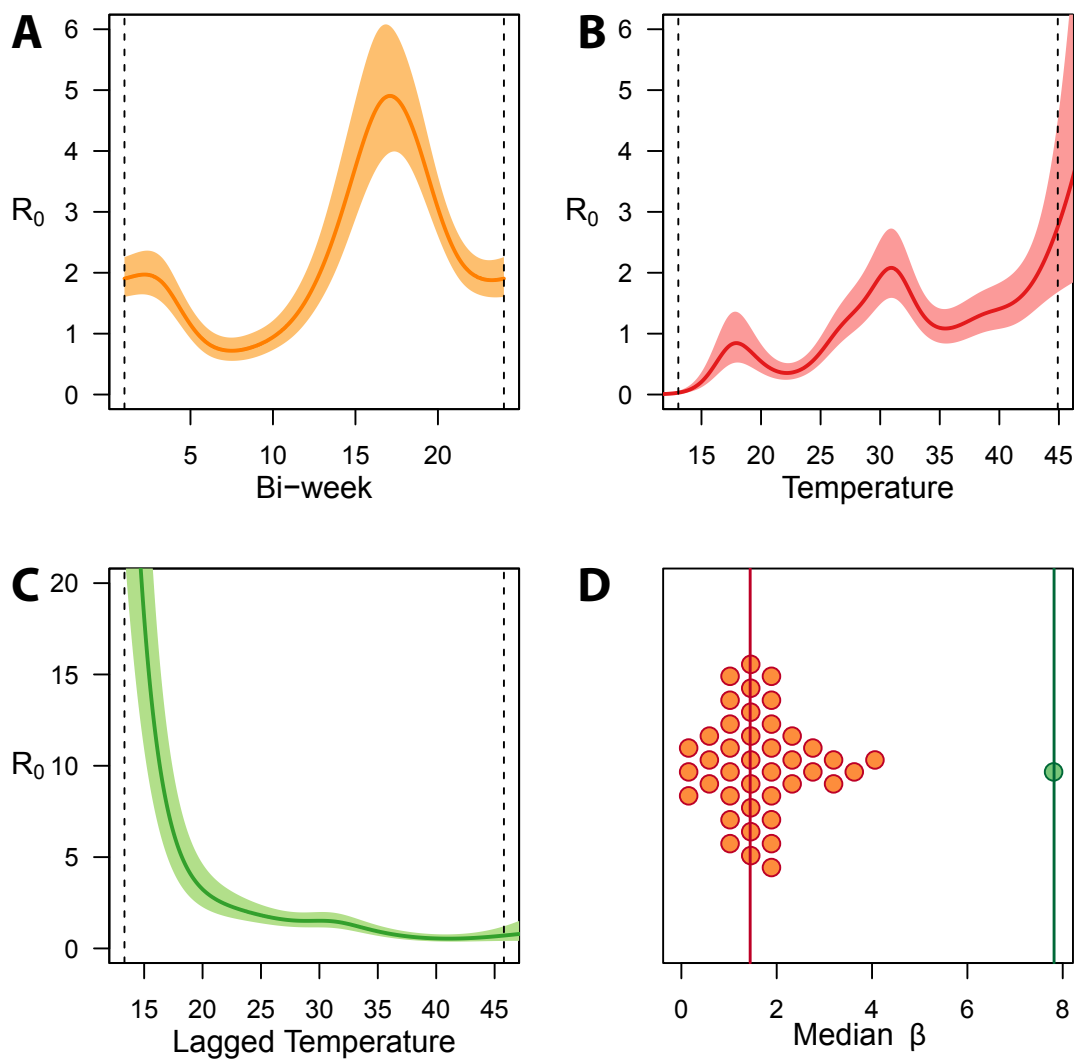

618

619

620

621

622 **Figure 3: Average distribution of  $R_0$  with green representing Lahore versus red all other**  
623 **districts (A), their geographical distribution (B), and over time in which the green line**  
624 **again is representing Lahore versus the red line representing all other districts (C).**

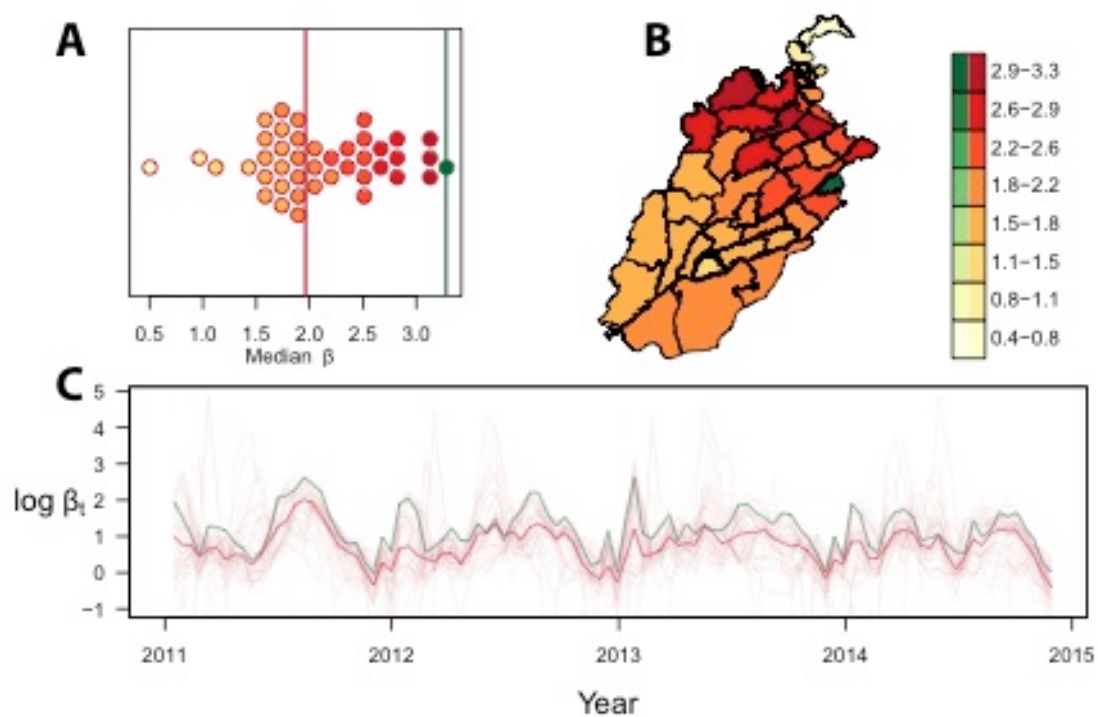

625

626

627 **Figure 4: Ratio of betas ( $R_0$ ) assuming equal force of infection and a difference in  $\alpha_2 -$**   
628  **$\alpha_1$  of 0.2, 0.15 (green), and 0.1, from top to bottom. The straight line indicates a ratio of**  
629 **1.**

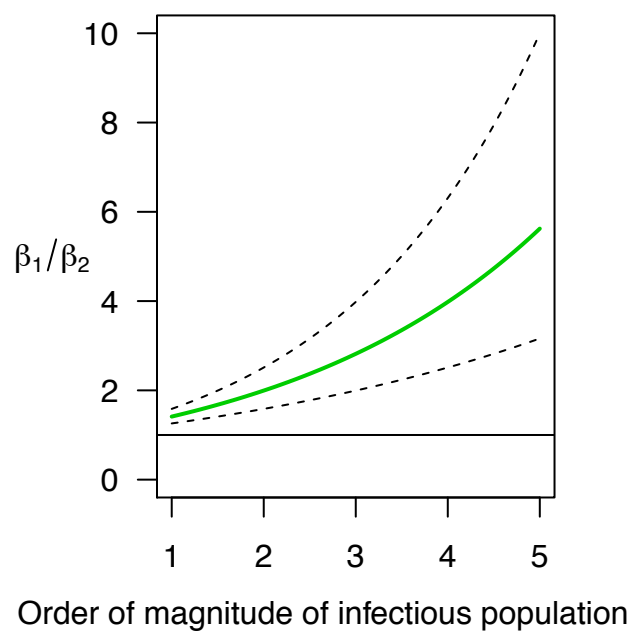

630 Order of magnitude of infectious population

631 **Figure 5: Critical proportion of the population to control in population 2 as a function of**  
632  **$R_0$  in population 1, the order of magnitude of the infectious numbers in each population,**  
633 **and a difference in  $\alpha_2 - \alpha_1$  of 0.1, 0.15 (green), and 0.2. The straight line indicates the**  
634 **critical proportion assuming the  $\alpha$  in each population are equal.**

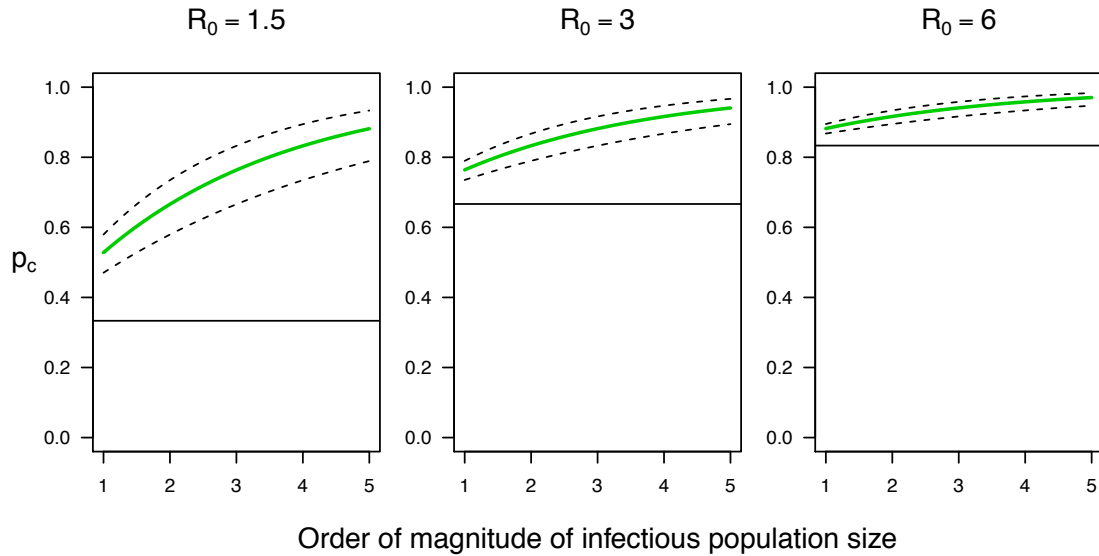

635  
636  
637  
638  
639  
640  
641  
642  
643  
644  
645  
646  
647  
648  
649  
650  
651

652 **Table S1: Reported case numbers per year for each district of the study region, Punjab**

653 **Province, Pakistan.**

| District       | 2011  | 2012 | 2013  | 2014 | Total |
|----------------|-------|------|-------|------|-------|
| Attock         | 7     | 1    | 0     | 18   | 26    |
| Bagh           | 0     | 0    | 0     | 0    | 0     |
| Bahawalnagar   | 65    | 0    | 0     | 0    | 65    |
| Bahawalpur     | 65    | 1    | 40    | 3    | 109   |
| Bhakkar        | 33    | 0    | 0     | 0    | 33    |
| Bhimber        | 0     | 0    | 0     | 0    | 0     |
| Chakwal        | 0     | 0    | 0     | 0    | 0     |
| D. G. Khan     | 3     | 0    | 0     | 0    | 3     |
| Faisalabad     | 981   | 58   | 125   | 0    | 1164  |
| Gujranwala     | 61    | 0    | 0     | 0    | 61    |
| Gujrat         | 0     | 24   | 0     | 0    | 24    |
| Hafizabad      | 1     | 0    | 0     | 0    | 1     |
| Jhang          | 6     | 0    | 0     | 0    | 6     |
| Jhelum         | 75    | 0    | 0     | 33   | 108   |
| Kasur          | 77    | 0    | 0     | 0    | 77    |
| Khanewal       | 2     | 0    | 0     | 1    | 3     |
| Khushab        | 37    | 0    | 0     | 0    | 37    |
| Kotli          | 0     | 0    | 0     | 0    | 0     |
| Lahore         | 18020 | 4013 | 11516 | 1799 | 35348 |
| Leiah          | 27    | 1    | 0     | 0    | 28    |
| Lodhran        | 0     | 0    | 0     | 0    | 0     |
| Mandi Bahauddi | 4     | 0    | 3     | 0    | 7     |
| Mianwali       | 6     | 0    | 0     | 0    | 6     |
| Mirpur         | 0     | 0    | 0     | 0    | 0     |
| Multan         | 371   | 1    | 64    | 4    | 440   |
| Muzaffarabad   | 0     | 0    | 0     | 0    | 0     |
| Muzaffargarh   | 0     | 0    | 0     | 0    | 0     |
| Narowal        | 26    | 2    | 0     | 0    | 28    |
| Neelum         | 0     | 0    | 0     | 0    | 0     |
| Okara          | 126   | 3    | 0     | 0    | 129   |
| Pakpattan      | 179   | 5    | 0     | 0    | 184   |
| Poonch         | 0     | 0    | 0     | 0    | 0     |
| Rahim Yar Khan | 0     | 0    | 0     | 0    | 0     |
| Rajanpur       | 0     | 0    | 0     | 0    | 0     |
| Rawalpindi     | 736   | 132  | 1845  | 2532 | 5245  |
| Sahiwal        | 69    | 4    | 3     | 0    | 76    |
| Sargodha       | 14    | 0    | 0     | 0    | 14    |
| Sheikhupura    | 29    | 3    | 42    | 179  | 253   |
| Sialkot        | 49    | 0    | 0     | 0    | 49    |
| Sudhnoti       | 0     | 0    | 0     | 0    | 0     |
| Toba Tek Singh | 7     | 1    | 6     | 2    | 16    |
| Vehari         | 106   | 264  | 228   | 18   | 616   |

654

655 **Table S2: Environmental model: no variation in  $\alpha$ .**

| Term                              | Estimate      | Std. Error    | t-value       | p-value           |
|-----------------------------------|---------------|---------------|---------------|-------------------|
| Intercept                         | <b>2.51</b>   | <b>0.679</b>  | <b>3.696</b>  | <b>0.00028</b>    |
| $\alpha$                          | <b>0.690</b>  | <b>0.040</b>  | <b>17.288</b> | <b>&lt; 2e-16</b> |
| EVI<br>(yearly average)           | <b>-8.78</b>  | <b>2.499</b>  | <b>-3.392</b> | <b>0.00082</b>    |
| <i>Ae. albopictus</i>             | <b>2.28</b>   | <b>0.544</b>  | <b>4.196</b>  | <b>3.93e-5</b>    |
| Precipitation<br>(yearly average) | <b>-0.021</b> | <b>0.0079</b> | <b>-2.590</b> | <b>0.0102</b>     |
| Term                              | edf           | Ref. df       | F             | p-value           |
| “Seasonality”                     | <b>3.44</b>   | <b>8.00</b>   | <b>1.566</b>  | <b>0.0034</b>     |
| Temperature                       | <b>7.55</b>   | <b>8.47</b>   | <b>2.537</b>  | <b>0.0102</b>     |
| 2-week lagged<br>temperature      | <b>5.47</b>   | <b>6.67</b>   | <b>2.300</b>  | <b>0.0304</b>     |
| EVI                               | <b>1.83</b>   | <b>2.33</b>   | <b>3.373</b>  | <b>0.0299</b>     |

656

657

658

659

660

661

662

663

664

665

666

667

668

669

670

671

672

673



674 **Table S3: Environmental model:  $\alpha$  in Lahore differs from other districts.**

675

| Term                      | Estimate      | Std. Error   | t-value       | p-value          |
|---------------------------|---------------|--------------|---------------|------------------|
| Intercept                 | <b>2.548</b>  | <b>0.676</b> | <b>3.769</b>  | <b>0.0002</b>    |
| $\alpha$ (Lahore)         | <b>0.741</b>  | <b>0.043</b> | <b>17.088</b> | <b>&lt;2e-16</b> |
| $\alpha$ (Not Lahore)     | <b>0.594</b>  | <b>0.055</b> | <b>10.887</b> | <b>&lt;2e-16</b> |
| EVI                       | <b>-7.636</b> | <b>2.527</b> | <b>-3.022</b> | <b>0.003</b>     |
| (yearly average)          |               |              |               |                  |
| <i>Ae. albopictus</i>     | <b>1.159</b>  | <b>0.679</b> | <b>1.708</b>  | <b>0.089</b>     |
| Precipitation             | <b>-0.008</b> | <b>0.009</b> | <b>-0.870</b> | <b>0.385</b>     |
| (yearly average)          |               |              |               |                  |
| Term                      | edf           | Ref. df      | F             | p-value          |
| "Seasonality"             | <b>3.238</b>  | <b>8.000</b> | <b>1.278</b>  | <b>0.0095</b>    |
| Temperature               | <b>7.502</b>  | <b>8.435</b> | <b>3.195</b>  | <b>0.0016</b>    |
| 2-week lagged temperature | <b>5.866</b>  | <b>7.067</b> | <b>2.371</b>  | <b>0.0231</b>    |
| EVI                       | <b>2.179</b>  | <b>2.784</b> | <b>3.690</b>  | <b>0.0154</b>    |

676

677

678

679

680

681

682

683

684

685

686 **Table S4: Full model: no variation in  $\alpha$ .**

687

| Term                              | Estimate        | Std. Error      | t-value       | p-value          |
|-----------------------------------|-----------------|-----------------|---------------|------------------|
| Intercept                         | <b>-34.83</b>   | <b>9.803</b>    | <b>-3.553</b> | <b>0.00047</b>   |
| $\alpha$                          | <b>0.578</b>    | <b>0.0451</b>   | <b>12.824</b> | <b>&lt;2e-16</b> |
| EVI<br>(yearly average)           | <b>-60.12</b>   | <b>15.04</b>    | <b>-3.998</b> | <b>8.71e-5</b>   |
| NDVI<br>(yearly average)          | <b>0.0383</b>   | <b>0.0103</b>   | <b>3.737</b>  | <b>0.00024</b>   |
| <i>Ae. albopictus</i>             | <b>2.745</b>    | <b>1.028</b>    | <b>2.669</b>  | <b>0.00826</b>   |
| Weighted<br>Access                | <b>2.742e-5</b> | <b>6.464e-6</b> | <b>4.242</b>  | <b>3.26e-5</b>   |
| Urbanicity                        | <b>-2.468</b>   | <b>0.9494</b>   | <b>-2.600</b> | <b>0.00776</b>   |
| Precipitation<br>(yearly average) | <b>-0.0684</b>  | <b>0.0185</b>   | <b>-3.697</b> | <b>0.00028</b>   |
| Term                              | edf             | Ref. df         | F             | p-value          |
| "Seasonality"                     | <b>4.480</b>    | <b>8.000</b>    | <b>4.173</b>  | <b>3.97e-7</b>   |
| Temperature                       | <b>7.607</b>    | <b>8.504</b>    | <b>4.396</b>  | <b>4.14e-5</b>   |
| 2-week lagged<br>temperature      | <b>4.823</b>    | <b>5.981</b>    | <b>3.793</b>  | <b>0.0013</b>    |

688

689 **Table S5: Full model:  $\alpha$  in Lahore differs from other districts.**

690

| Term                              | Estimate       | Std. Error     | t-value       | p-value          |
|-----------------------------------|----------------|----------------|---------------|------------------|
| Intercept                         | <b>-35.92</b>  | <b>9.93</b>    | <b>-3.618</b> | <b>0.00037</b>   |
| $\alpha$ (Lahore)                 | <b>0.612</b>   | <b>0.0643</b>  | <b>8.510</b>  | <b>&lt;2e-16</b> |
| $\alpha$ (Not Lahore)             | <b>0.555</b>   | <b>0.0566</b>  | <b>9.802</b>  | <b>&lt;2e-16</b> |
| EVI<br>(yearly average)           | <b>-61.59</b>  | <b>15.19</b>   | <b>-4.055</b> | <b>6.95e-5</b>   |
| NDVI<br>(yearly average)          | <b>0.0395</b>  | <b>0.010</b>   | <b>3.8</b>    | <b>0.00019</b>   |
| <i>Ae. albopictus</i>             | <b>2.81</b>    | <b>1.033</b>   | <b>2.721</b>  | <b>0.0070</b>    |
| Weighted<br>Access                | <b>2.42e-5</b> | <b>7.86e-6</b> | <b>3.072</b>  | <b>0.0024</b>    |
| Urbanicity                        | <b>-2.33</b>   | <b>0.9697</b>  | <b>-2.403</b> | <b>0.0171</b>    |
| Precipitation<br>(yearly average) | <b>-0.069</b>  | <b>0.0186</b>  | <b>-3.733</b> | <b>0.00024</b>   |
| Term                              | edf            | Ref. df        | F             | p-value          |
| "Seasonality"                     | <b>4.350</b>   | <b>8.000</b>   | <b>3.817</b>  | <b>1.31e-6</b>   |
| Temperature                       | <b>7.620</b>   | <b>8.511</b>   | <b>4.335</b>  | <b>4.97e-5</b>   |
| 2-week lagged<br>temperature      | <b>4.764</b>   | <b>5.916</b>   | <b>3.680</b>  | <b>0.00178</b>   |

691

692 **Figure S1: Predicted versus expected values for  $\alpha$  in Lahore (green) and all other**  
693 **districts (red) for the environmental model.**

694

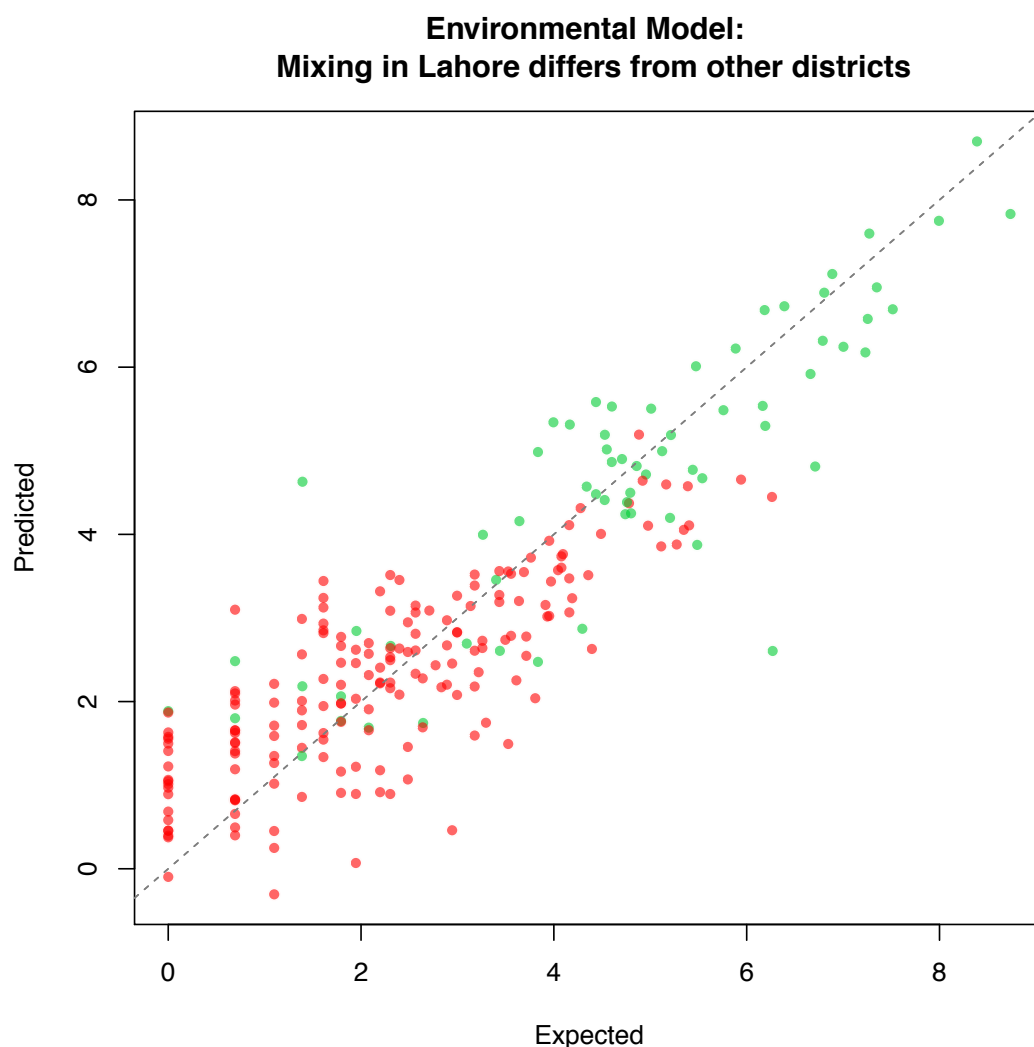

695

696 **Additional information about collection of epidemiological data.**

697 Secondary data from hospital records were used from Punjab province in Pakistan. The data  
698 was initially collected by Punjab Health Department as part of the dengue prevention and  
699 eradication program. For ensuring accurate reporting from the health facilities, Punjab Health  
700 Department used the following three procedures: (i) Clinical case reporting, (ii) Lab case  
701 reporting, and (iii) Case management. All health facilities were liable to record the data and  
702 share them with Punjab Information Technology Board (PITB) within 24 hours. For clinical case  
703 reporting, as per Dengue Expert Advisory Group (DEAG), guidelines, dengue suspects,  
704 probable, and confirmed cases needed to be correctly entered on the PITB dashboard within  
705 24 hours of admission. For lab case reporting, all private sector labs must send reports of

706 positive dengue cases in the line list format to the respective Executive District Officer Health  
707 (EDOH) for online entry on the dashboard, again within 24 hours. For case management, the  
708 healthcare facilities are liable to manage dengue cases regularly in specified Dengue care units,  
709 OPDs, emergency units, or wards.
